# Supplementary material
Source: publisher site journal article supplement (https://www.dovepress.com/get_supplementary_file.php?f=220726.docx)
Supplement: Supplementary file 1 [file get_supplementary_file.php]

**Supplementary material**

**Explanation of the model and assumptions:**

- The model reflects 1-year outcomes of a patient who undergoes *de novo* treatment and is diagnosed with HER2-positive, HR-negative, advanced-stage (III and IV) breast cancer.
- Patients who do not undergo a liquid biopsy are treated the trastuzumab, pertuzumab, and docetaxel regimen as the first-line treatment, according to the NCCN Clinical Practice Guidelines in Oncology- Breast Cancer Version 1.20181 and the usual clinical practice. Hormone therapy drugs are not considered given that the population under study corresponds to the negative hormonal receptor type.
- The model assumes that all patients receiving this first-line treatment develop clinical resistance,2.3 although not all in the 1st year. Having detected clinical resistance, patients will migrate to a second-line treatment, which in our model consists of trastuzumab emtansine (TDM1).3,4
- If liquid biopsy is included, this may give a positive or negative result in the first measurement for resistance or in a subsequent measurement, which in the model is assumed to be carried out after 4 and 8 months after the first-line treatment has begun, according to the clinical recommendation of experts in this evaluation and the follow-up model reported in literature5.
- The model does not contemplate the performance of liquid biopsy at month 0 because once the patients are typified with HER2-positive cancer, they are placed in a first-line therapeutic regimen, at least for 1 cycle.
- If the liquid biopsy is positive for resistance, patients will migrate to a second-line treatment, which in the case of this study corresponds to the trastuzumab emtansine (TDM1) regimen, according to the ASCO and NCCN guidelines.1,6
- The third line of treatment was not modeled. No evidence was documented regarding the use of liquid biopsy following the second line of treatment.

**References**

1.  Gradishar WJ, Anderson BO, Balassanian R, Blair SL, Burstein HJ, Cyr A, et al. Invasive Breast Cancer Version 1.2016, NCCN Clinical Practice Guidelines in Oncology. J Natl Compr Canc Netw. 2016; 14(3): 324-54

2. Labidi S, Mejri N, Lagha A, Daoud N, El Benna H, Afrit M, et al. Targeted therapies in HER2-overexpressing metastatic breast cancer. Breast Care (Basel). 2016; 11(6):418–22.

3.  Yao M, Fu P. Advances in anti-HER2 therapy in metastatic breast cancer. Chin Clin Oncol. 2018;7(3):27.

4. Diaby V, Ali AA, Williams KJ, Ezendu K, Soto-Perez-de-Celis E, Chavarri-Guerra Y, et al. Economic evaluation of sequencing strategies in HER2-positive metastatic breast cancer in Mexico: a contrast between public and private payer perspectives. Breast Cancer Res Treat. 2017; 166(3):951–63.

5. Appierto V, Di Cosimo S, Reduzzi C, Pala V, Cappelletti V, Daidone MG. How to study and overcome tumor heterogeneity with circulating biomarkers: the breast cancer case. Semin Cancer Biol. 2017; 44:106–116.

6.  Giordano SH, Temin S, Kirshner JJ, Chandarlapaty S, Crews JR, Davidson NE, et al. Systemic therapy for patients with advanced human epidermal growth factor receptor 2–positive breast cancer: American Society of Clinical Oncology clinical practice guideline. J Clin Oncol. 2014; 32(19):2078-99.
